# Supplementary material for: Formation of AgGaS2 nano-pyramids from Ag2S nanospheres through intermediate Ag2S–AgGaS2 heterostructures and AgGaS2 sensitized Mn2+ emission
Source: Royal Society of Chemistry journal article supplement (doi:10.1039/c3nr04765b), 2013-11-20
Supplement: c3nr04765b.pdf [file c3nr04765b.pdf]

## Electronic Supplementary Information

### Formation of AgGaS<sub>2</sub> nano-pyramids from Ag<sub>2</sub>S nanospheres through intermediate Ag<sub>2</sub>S-AgGaS<sub>2</sub> heterostructures and AgGaS<sub>2</sub> sensitized Mn<sup>2+</sup> emission

Feng Huang, Jiangcong Zhou, Ju Xu, Yuansheng Wang\*

Figure S1-S2

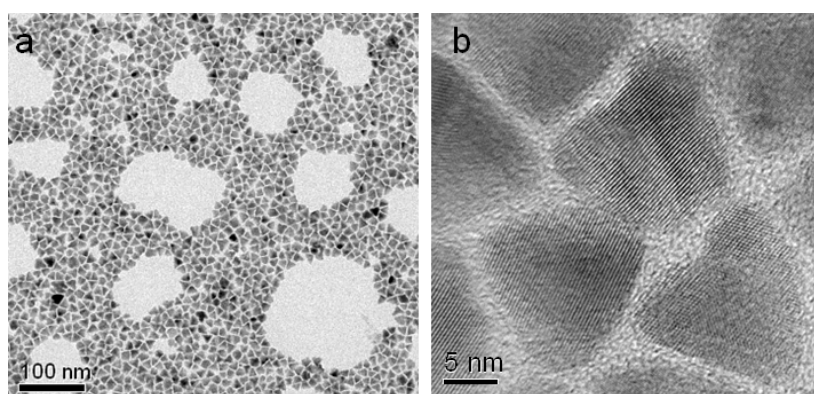

Figure S1 (a) TEM micrograph, and (b) HRTEM image of the product having reacted for 1 hour

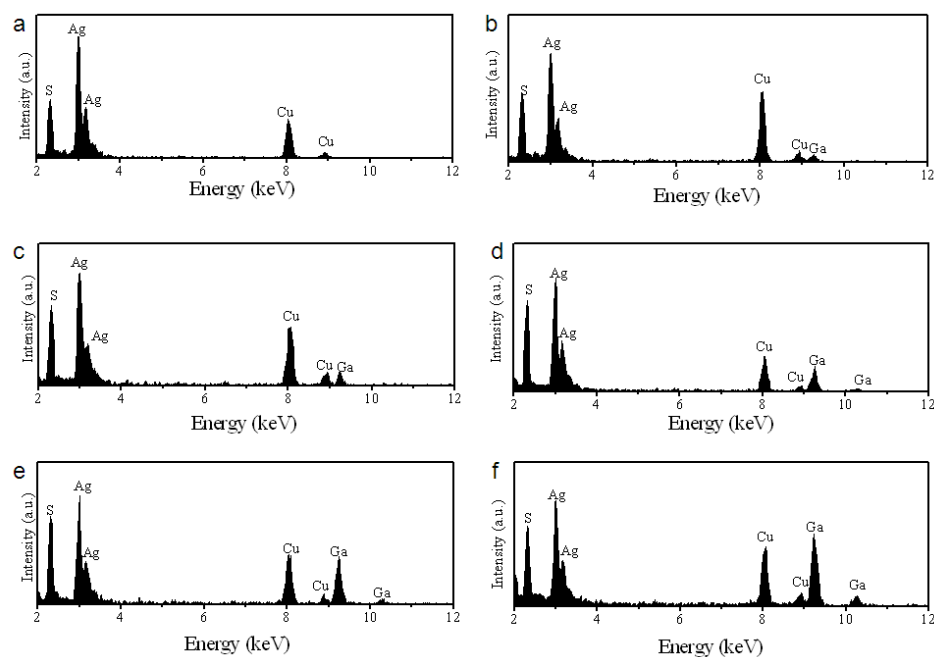

Figure S2 EDS spectra of the products having reacted for 1 min, 3 min, 5 min, 10 min, 20 min and 30 min respectively; the Cu signal comes from the copper grid.
